# Supplementary material
Source: publisher figshare collection journal article supplement (https://asha.figshare.com/articles/dataset/_/25962541)
Supplement: Supplementary file 1 [file 1]

**Supplemental Material S2.** A repeated-measures ANOVA, treating compression speed, the number of background talkers, and audiogram as the independent variables, the individual 2-second time windows as the random effects factor, and output/input SNR slope as the dependent variable.

|                        |                                                |
|------------------------|------------------------------------------------|
| Audiogram (A)          | $F(3, 42) = 47.204, p < .001, \eta^2_p = .771$ |
| Compression Speed (CS) | $F(1, 14) = 40.565, p < .001, \eta^2_p = .743$ |
| Number of Talker (NT)  | $F(1, 14) = 62.424, p < .001, \eta^2_p = .817$ |
| A × CS                 | $F(3, 42) = 3.585, p < .05, \eta^2_p = .204$   |
| A × NT                 | $F(3, 42) = 2.49, p = .073, \eta^2_p = .151$   |
| CS × NT                | $F(1, 14) = 33.934, p < .001, \eta^2_p = .708$ |
| A × CS × NT            | $F(3, 42) = 11.964, p < .001, \eta^2_p = .461$ |
