# Supplementary material
Source: publisher figshare collection journal article supplement (https://asha.figshare.com/articles/dataset/_/25962541)
Supplement: Supplementary file 2 [file 1]

**Supplemental Material S3.** A repeated-measures ANOVA, treating input SNR, the number of background talkers, compression speed, and audiogram as the independent variables, the individual 2-second time windows as the random effects factor, and the difference in output SNR between the WDRC-only and WDRC+NR conditions as the dependent variable.

|                        |                                                  |
|------------------------|--------------------------------------------------|
| Audiogram (A)          | $F(3, 42) = 5.08, p < .05, \eta^2_p = .266$      |
| Compression Speed (CS) | $F(1, 14) = 0.5, p = .491, \eta^2_p = .034$      |
| Number of Talker (NT)  | $F(1, 14) = 101.729, p < .001, \eta^2_p = .879$  |
| Input SNR (IS)         | $F(4, 56) = 235.797, p < .001, \eta^2_p = .944$  |
| A × CS                 | $F(3, 42) = 12.327, p < .001, \eta^2_p = .468$   |
| A × NT                 | $F(3, 42) = 19.305, p < .001, \eta^2_p = .58$    |
| CS × NT                | $F(1, 14) = 0.073, p = .79, \eta^2_p = .005$     |
| A × CS × NT            | $F(3, 42) = 7.757, p < .001, \eta^2_p = .357$    |
| A × IS                 | $F(12, 168) = 30.373, p < .001, \eta^2_p = .684$ |
| CS × IS                | $F(4, 56) = 4.748, p < .05, \eta^2_p = .253$     |
| A × CS × IS            | $F(12, 168) = 9.723, p < .001, \eta^2_p = .41$   |
| NT × IS                | $F(4, 56) = 18.756, p < .001, \eta^2_p = .573$   |
| A × NT × IS            | $F(12, 168) = 3.535, p < .001, \eta^2_p = .202$  |
| CS × NT × IS           | $F(4, 56) = 3.052, p < .05, \eta^2_p = .179$     |
| A × CS × NT × IS       | $F(12, 168) = 9.371, p < .001, \eta^2_p = .401$  |
