# Supplementary material
Source: publisher figshare collection journal article supplement (https://asha.figshare.com/articles/dataset/_/25962541)
Supplement: Supplementary file 3 [file 1]

**Supplemental Material S1.** A repeated-measures ANOVA, treating input SNR, the number of background talkers, compression speed, and audiogram as the independent variables, the individual 2-second time windows as the random effects factor, and output SNR as the dependent variable.

|                        |                                                  |
|------------------------|--------------------------------------------------|
| Audiogram (A)          | $F(3, 42) = 1.788, p = .164, \eta^2_p = .113$    |
| Compression Speed (CS) | $F(1, 14) = 0.007, p = .935, \eta^2_p = 0$       |
| Number of Talker (NT)  | $F(1, 14) = 18.283, p = .001, \eta^2_p = .566$   |
| Input SNR (IS)         | $F(4, 56) = 7211.23, p < .001, \eta^2_p = .998$  |
| A × CS                 | $F(3, 42) = 17.347, p < .001, \eta^2_p = .553$   |
| A × NT                 | $F(3, 42) = 12.566, p < .001, \eta^2_p = .473$   |
| CS × NT                | $F(1, 14) = 20.086, p = .001, \eta^2_p = .589$   |
| A × CS × NT            | $F(3, 42) = 6.1, p < .05, \eta^2_p = .303$       |
| A × IS                 | $F(12, 168) = 34.062, p < .001, \eta^2_p = .709$ |
| CS × IS                | $F(4, 56) = 37.975, p < .001, \eta^2_p = .731$   |
| A × CS × IS            | $F(12, 168) = 6.341, p < .001, \eta^2_p = .312$  |
| NT × IS                | $F(4, 56) = 47.144, p < .001, \eta^2_p = .771$   |
| A × NT × IS            | $F(12, 168) = 4.194, p < .001, \eta^2_p = .231$  |
| CS × NT × IS           | $F(4, 56) = 21.259, p < .001, \eta^2_p = .603$   |
| A × CS × NT × IS       | $F(12, 168) = 11.328, p < .001, \eta^2_p = .447$ |
